# Supplementary figures and images for: Monoacylglycerol lipase inhibitors produce pro- or antidepressant responses via hippocampal CA1 GABAergic synapses
Source: PubMed Central journal article supplement — Mol Psychiatry. 2016 Mar 22;22(2):215–26. doi: 10.1038/mp.2016.22 (PMC5285470; doi:10.1038/mp.2016.22), 2016-03-22

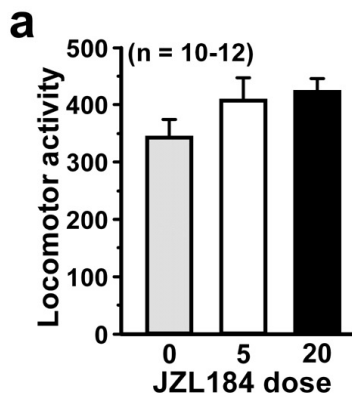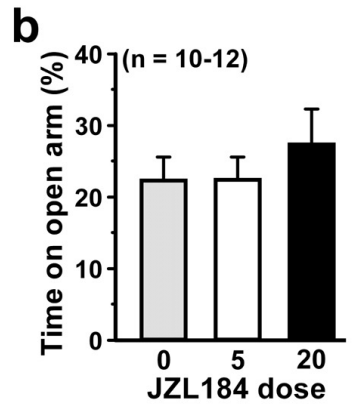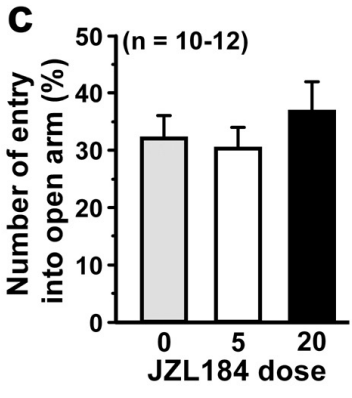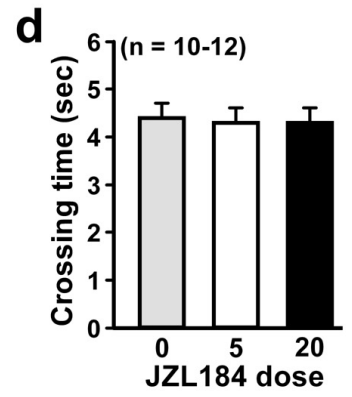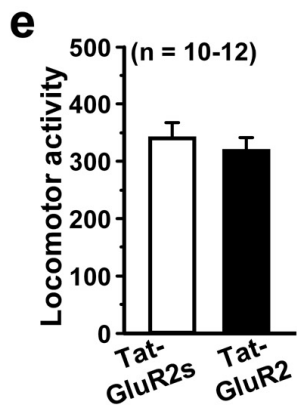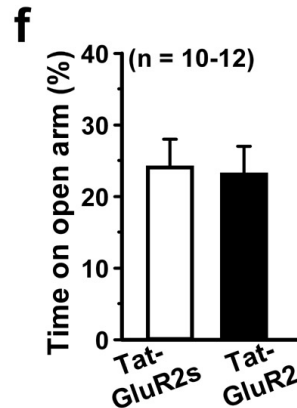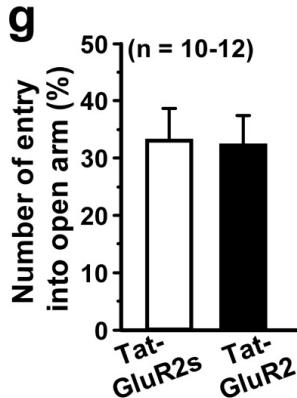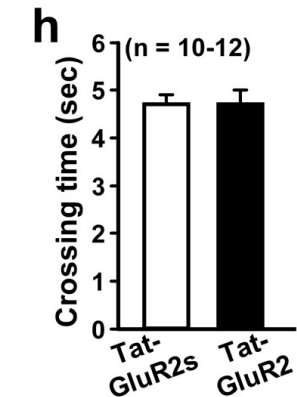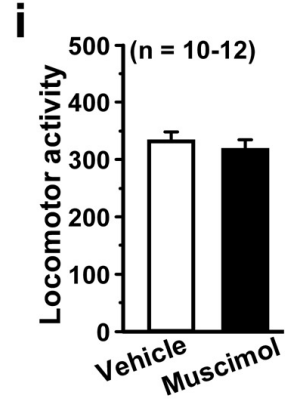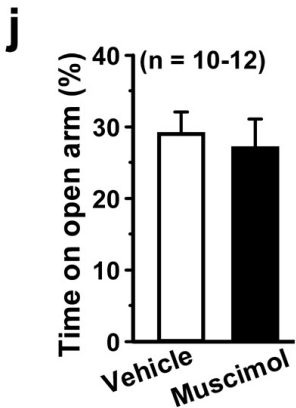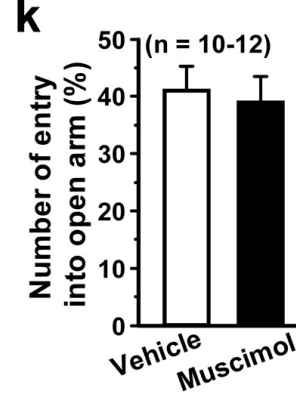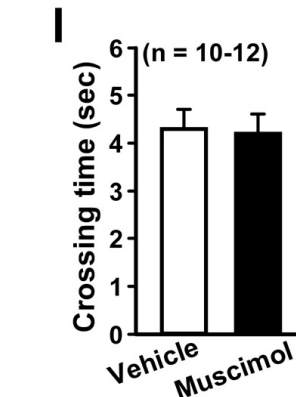

**Figure S1**

Supplement: mp201622x2.pdf [file mp201622x2.pdf]

# Figure S2

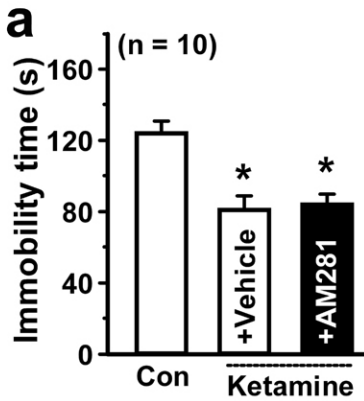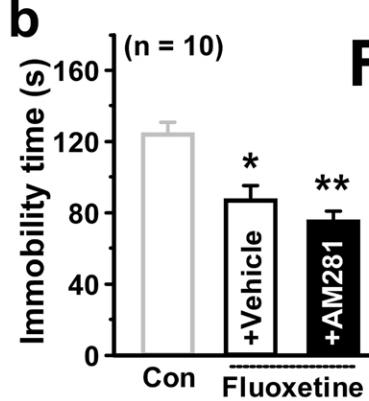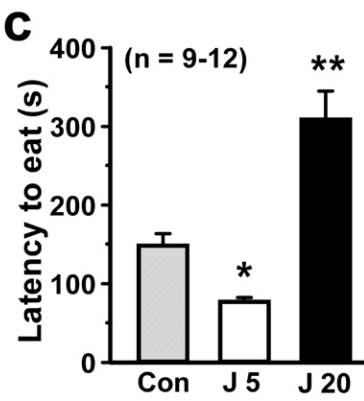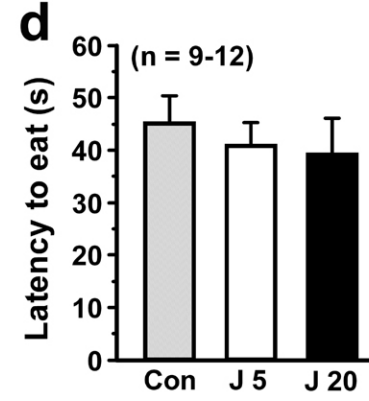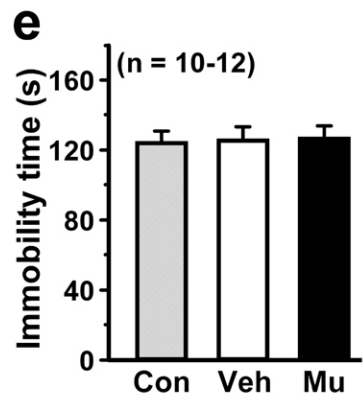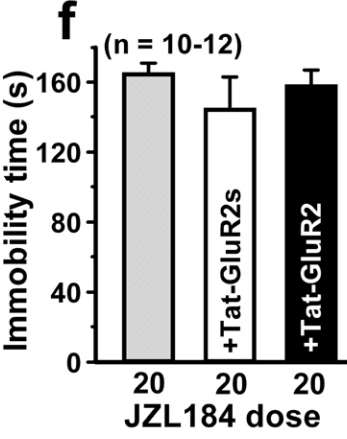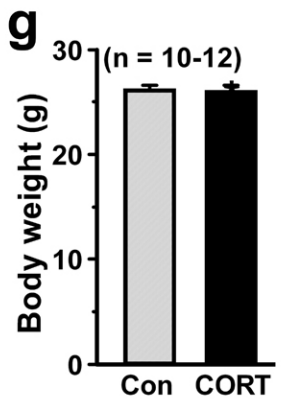

Supplement: mp201622x3.pdf [file mp201622x3.pdf]

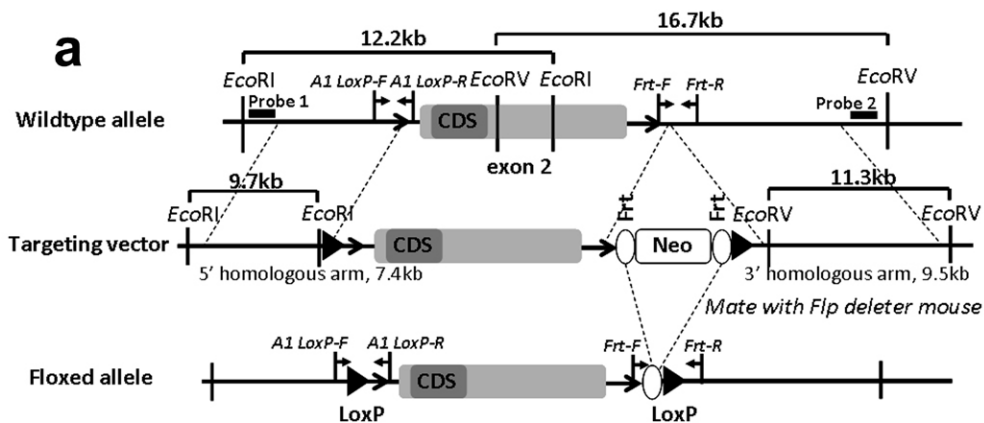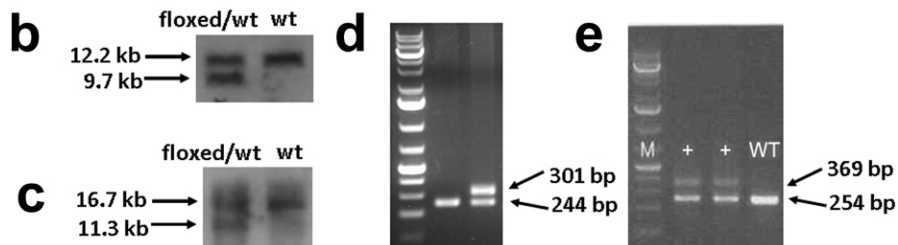

**Figure S3**

Supplement: mp201622x4.pdf [file mp201622x4.pdf]

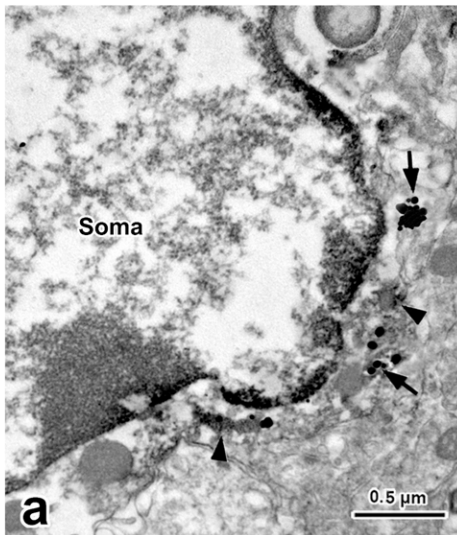

GFAP-*CB1R*-WT

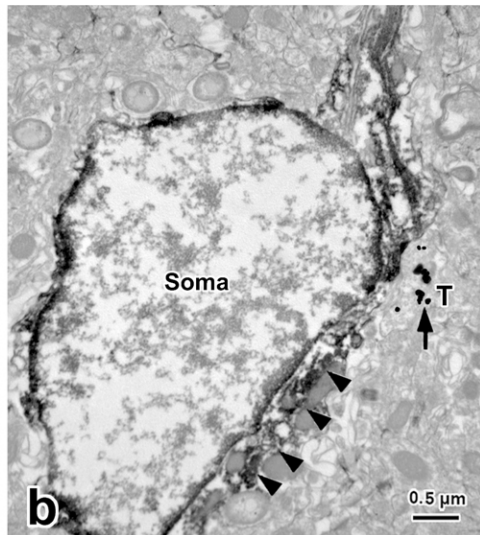

GFAP-*CB1R*-KO

# Figure S4

Supplement: mp201622x5.pdf [file mp201622x5.pdf]

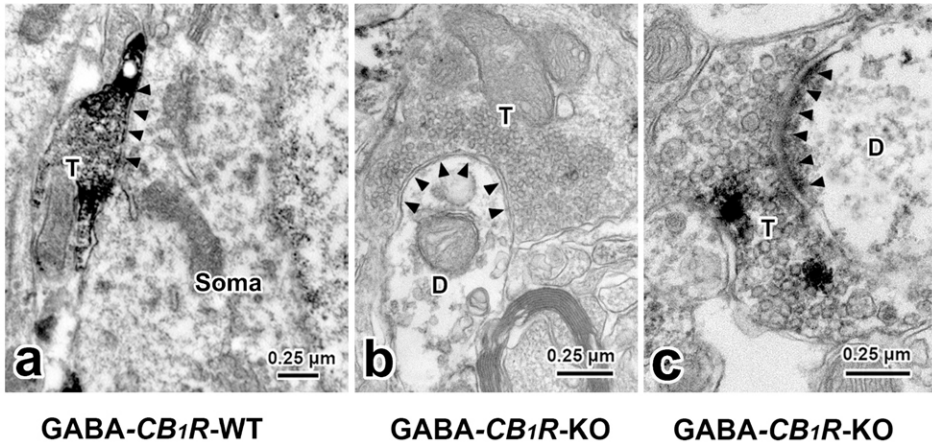

**Figure S5**

Supplement: mp201622x6.pdf [file mp201622x6.pdf]

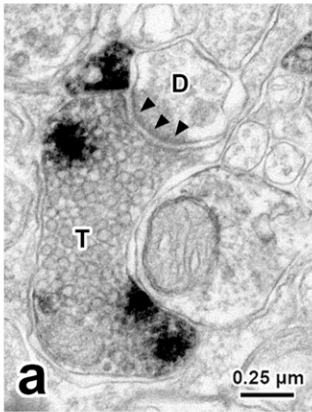

**a** GLu-*CB1R*-WT

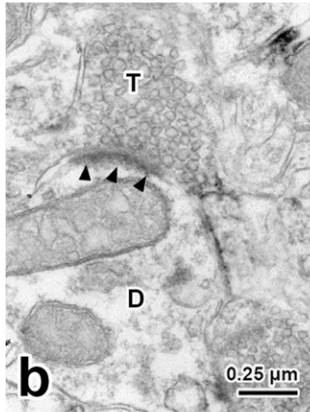

**b** GLu-*CB1R*-KO

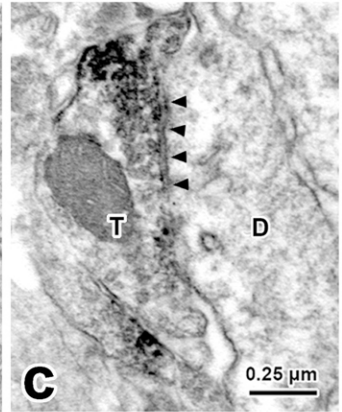

**c** GLu-*CB1R*-KO

# Figure S6

Supplement: mp201622x7.pdf [file mp201622x7.pdf]

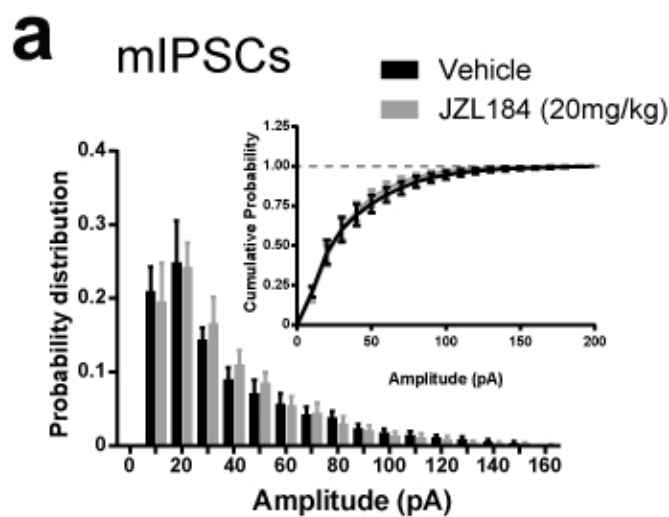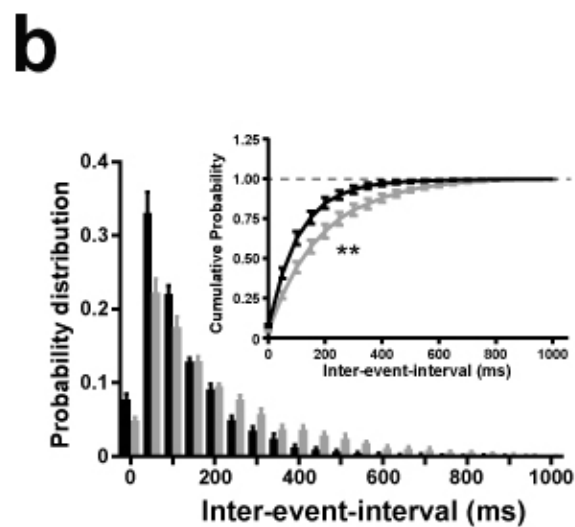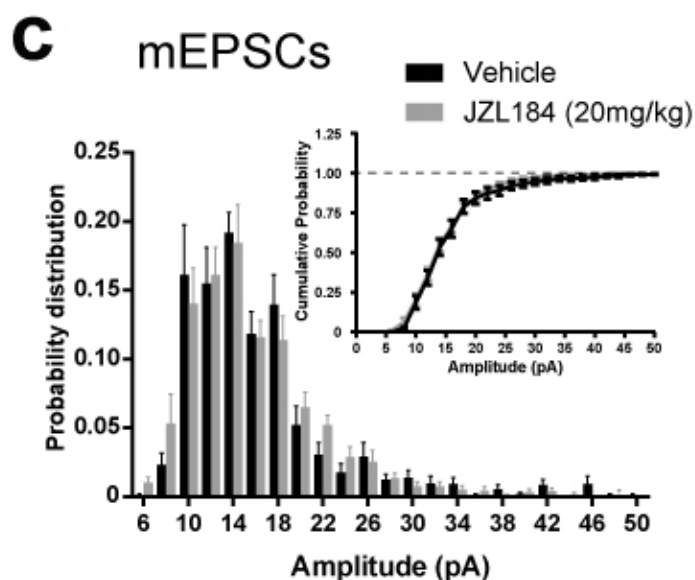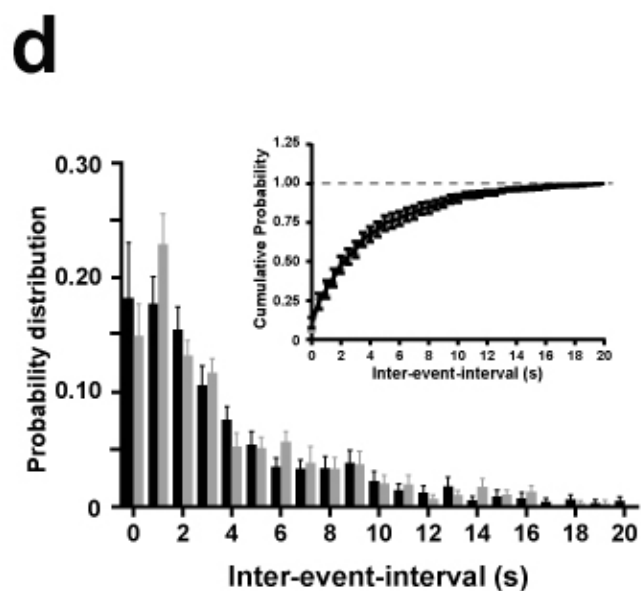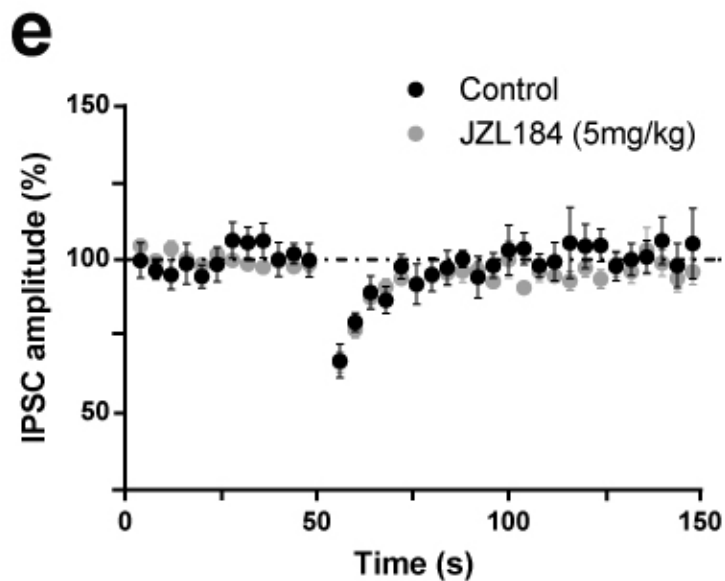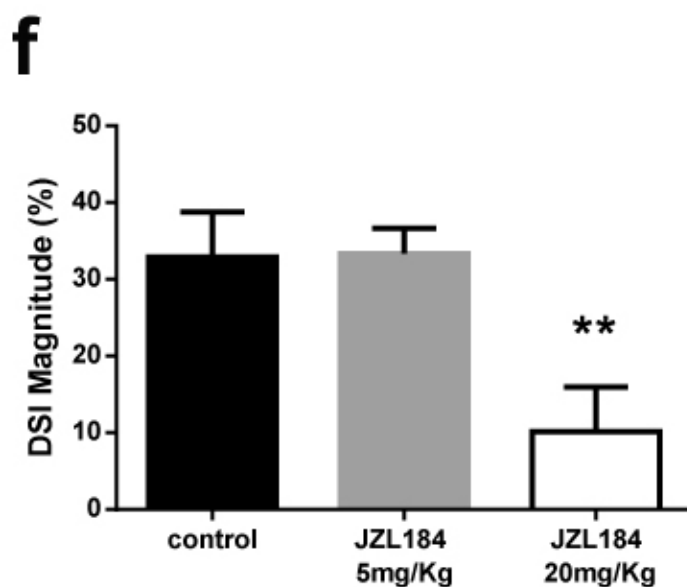

Supplement: mp201622x8.pdf [file mp201622x8.pdf]

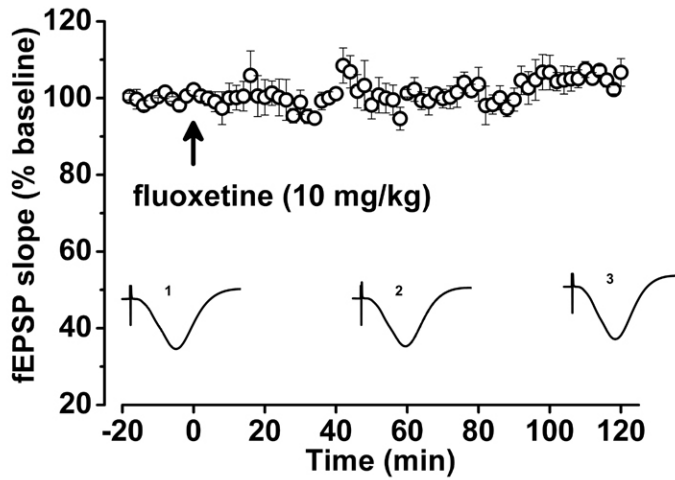

**Figure S8**

Supplement: mp201622x9.pdf [file mp201622x9.pdf]
